# Supplementary material for: Chromatoid Body Protein TDRD6 Supports Long 3’ UTR Triggered Nonsense Mediated mRNA Decay
Source: PLoS Genet. 2016 May 5;12(5):e1005857. doi: 10.1371/journal.pgen.1005857 (PMC4858158; doi:10.1371/journal.pgen.1005857)
Supplement: S4 Table — Column 1: Primer name (including the name of the gene target), Column 2: Primer sequence, Column 3: Primer length, Column 4: Annealing temperature of the primer. Column 5: Product length of primer pairs. Columns 6–10: Primer details as previously (columns1-5) for nascent mRNA RT PCR. (XLS) [file pgen.1005857.s012.xls]

## Sheet: Sheet1
Primer Name	Sequence 5'->3'	Primer Length nt	Tm oC	Product Length nt	Primer Name	Sequence 5'->3'	Primer Length	Tm	Product Length
For mature mRNA RT-PCR					For nascent mRNA RT-PCR
Figure 1 E, F					Figure 5 D
Upf1 for	GGTTAAGAGACATGCGGCTCA	21	60.4	177
Upf1 rev	AGTTGTGGGTCACTTCCACA	20	59
Upf2 for	GACCAGTGTGCTTTTGGAGC	20	59.6	229
Upf2 rev	GGGCAACTTTCGCATCTGTC	20	59.8
Hormad1 for	GTAAGGAAGAAGAAACTATGC	21	52	251
Hormad1 rev	TGTTTGTCACCTACACTCAGG	21	57.5
Tdrd6 for	GAAGGAAGGAAGTGCGGGAGC	21	63.3	349
Tdrd6 rev	CACCTCCACACGCCTCCTCC	20	64.3
Prm2 For	CAGAAGGCGGAGGAGACAC	19	61	75
Prm2 Rev	CTCCTCCTTCGGGATCTTCT	20	59.4
Inha for	CTGTTGACCCTACGGGATGT	20	59.1	242
Inha rev	GCACCTGTAGCTGGGAAAAG	20	58.2
β-actin for	GGCTGTATTCCCCTCCATCG	20	59.9	154
β-actin rev	CCAGTTGGTAACAATGCCATGT	22	59.4		β-actin rev intron	GTGGAAGGGAACAGCCTTCTTA	22	59.9	125
Figure 1 E
Map3k14 for	GAGCTACTTCAACGGGGTCAA	21	60	183
Map3k14 rev	GGCACCTCCATGTCATAGCA	20	59.8
Arfrp1 for	TGTTCCCATCCTGGTGTTGG	20	59.8	151
Arfrp1 rev	AACTCCTTTGCCTGTGAGGG	20	59.8
Dusp10 For	GAGTACTAGTGTGCCTGACAG	21	57.5	192
Dusp10 Rev	TGGTTAGGACAATTGGCTGAG	21	57.9
Atf5 for	GGCAAGGAGGATGCCTTTTC	20	59.1	123
Atf5 rev	GGTCAAGAGCTCATCTGGCA	20	59.7
For detecting different mRNA splice variants with RT PCR Figure 4 D
Hnrnpl for	AGA ACG ATC AAG ATA CTT GGG A	22	56.6	normal 122
Hnrnpl rev	ATA TTC TGC GGG ATG ATC TCC	21	57.1	PTC containing 192
Brd2 for	TCT GCT GTA TGA GGG ATT TGA G	22	57.5	normal 268
Brd2 rev	GAT AGT ACC CAT GTC CAT AGG C	22	57.5	PTC containing 360
Hnrnph3 for	CAG CAA AGA GGA AAT AGT TCA G	22	55.1	normal 217
Hnrnph3 rev	CAC CAT CAT ATC CAT CAC CT	20	54.2	PTC containing 356
Mdm2 for	GGG ACC CTC TCG GAT CAC	18	58.4	normal 226
Mdm2 rev	GGA CTC CAA ACA CAT CTC CT	20	58.8	PTC containing 311
Pkm2 for	GCA GCA GCT TTG ATA GTT CTC	21	57.3	normal 206
Pkm2 rev	GCC AAG TTT ACA CGA AGG TC	20	57	PTC containing 740
Srsf2 for	AGA TCA ACC TCC AAG TCC AG	20	56.5	normal 236
Srsf2 rev	CCA ATG TCC TCT GTT AAG CC	20	56.1	PTC containing 390
Srsf3 for	AAG AGA AGT CGG AAT CGT GG	20	57.3	normal 161
Srsf3 rev	GAC CTT TCT CTT CTC CTA TCT C	22	54.8	PTC containing 650
For RT PCR and RIP qRT PCR Figure 5
Ecsit for	CCTAAGAGCTGACCTGCCAC	20	60.1	156
Ecsit rev	ACAGGGCCTTCTGTCACTTC	20	59.6		Ecsit rev intron	AAACTCAGAGAGCTCGGCCT	20	60.9	221
Spen for	GCCAGGAGAATGACAGTGGAA	21	60	196	Spen for intron	AGGAGGTAGGGGACAGCTAA	20	58.8	190
Spen rev	AGATCTGAAGCACGTAGGCA	20	58.8
Prss51 for	GGCCATGGTTCAGCCAAAGG	20	61.8	194	Prss51 for intron	TGCTCATACCACTAGCCACC	20	59.1	138
Prss51 rev	CGAGTCTCCCAGTTAGCACA	20	59.1
Diap1 for	TGTTTTTGCAAGCAGTCAAGG	21	58.1	148	Diap for intron	CTAGCTGTATTCAAACCTTCAT	22	53.9	219
Diap1 rev	CCCTCTGCGTTCATGTCGAT	20	60.1		Diap rev intron	GCACACCCAGCCTTCCTGTTGA	22	65.2
Mdc1 for	TTTAGCTTCAGCCTTCGGGA	20	59	179
Mdc1 rev	ACTCGGTGAAGCTTATAGGAGTG	23	59.6		Mdc1 rev intron	CAAAGGCACTGGGAAACCTCT	21	60.4	133
Ube2c for	TCCTCATGACATCTGGTGACAA	22	59	163	Ube2c for intron	TGGGGCTTGGATGGAATGTG	20	60.3	162
Ube2c rev	GTGGGTGCGTTGTAAGGGTA	20	59.9
Wnt3 for	GCAAGTAGTGAGCCAGGGCA	20	62.4	199	Wnt3 for intron	GTTTATTTCCCAAAGGGCACTG	22	58	198
Wnt3 rev	AGTTGAGAAAGAAGCCGCCC	20	60.6
Dixdc1 for	ATATTCCAAAGAGGTTGGGGGA	22	58.7	124	Dixdc1 for intron	TAAACTAACACACTACCTTCCCAGC	26	60.5	180
Dixdc1 rev	ACCTCTTCTTTGACTGTGCCAA	22	60
Yap1 for	CGAGATGAGAGCACAGACAG	20	57.8	106
Yap1 rev	TGGTGTCTCCTGTATCCATTTCA	23	59.1		Yap1 rev intron	CAGCCTGTCCTAGCTACACTGT	22	61.4	193
Daam1 for	AAGCTCAGCTCAAAGAGCAGC	21	61.2	128	Daam1 for intron	ATTCCCTGCCGTGGCCCAGAA	21	66.5	203
Daam1 rev	GTCTTTGTCGAACACCTCTCCT	22	59.9
Twsg1 for	AGCGACAAAGAGCGCATGT	19	60.6	150	Twsg1 for intron	CGAGCTCTTCCTGCCTGTACTGA	23	63.8	183
Twsg1 rev	GTCAATGCACTCTGGACCGA	20	60
For Auf1 mRNA isoform mapping Supplemental Figure 6
exon 8 for	CATTTGCAACTTATCCCCAACAG	23	58.5
EJ 8-10rev	AAA TAC TGC TTC ACC ACC TGT TGG G	25	63
EJ 8-9 for	CCA ACA GCG GGA ACT TCA TTG C	22	62.1
EJ 9-10 rev	TCA CCA CCA AAC GGC AGC ATT C	22	62.1
intron 8 for	AAT GGG TAC AAA TTA AGG AAT TGC AGC	27	60.4
intron 9 rev	AAG GCA AAG CTT GAA GTA TC	20	53.2
			I) exon 8 for & EJ 8-10rev
			II) EJ 8-9 for & EJ 9-10 rev
			III) intron 8 for & EJ 9-10 rev
			IV) EJ 8-9 for & intron 9 rev
			V) intron 8 for & intron 9 rev
